# Supplementary material for: Activation of viral transcription by stepwise largescale folding of an RNA virus genome
Source: PubMed Central journal article supplement — Nucleic Acids Res. 2020 Aug 12;48(16):9285–300. doi: 10.1093/nar/gkaa675 (PMC7498350; doi:10.1093/nar/gkaa675), 2020-08-12
Supplement: gkaa675_supplemental_file.pdf [file gkaa675_supplemental_file.pdf]

**SUPPLEMENTARY FIGURES (Figures S1 – S13)**

**Activation of Viral Transcription by Stepwise Largescale Folding  
of an RNA Virus Genome**

**Tamari Chkuaseli and K. Andrew White**

Department of Biology, York University, Toronto, Ontario, Canada M3J 1P3

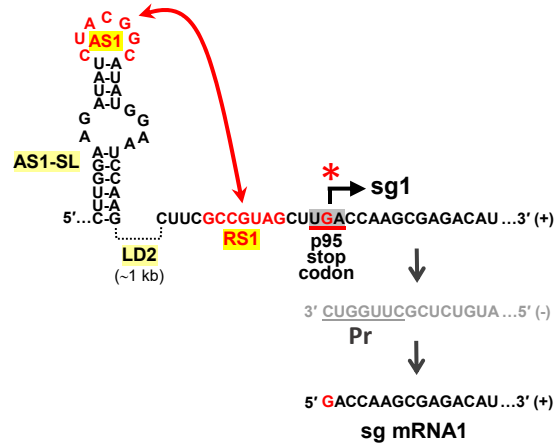

**Figure S1. Detailed depiction of the AS1 and RS1 RNA elements in CIRV that activate sg mRNA1 transcription.** AS1 and RS1 are shown in red, with AS1 positioned in the terminal loop of AS1-SL. The p95 stop codon (red underline) overlaps with the initiating nucleotide for sg mRNA1 transcription (red G). The truncated minus-strand RNA intermediate synthesized during sg mRNA1 transcription is shown in grey nucleotides, with the promoter (Pr) sequence underlined. The minus-strand intermediate is generated when the RdRp encounters the AS1/RS1 stem in the genome, which causes it to terminate synthesis. The 3'-truncated minus-strand generated then serves as a template for transcription of sg mRNA1.

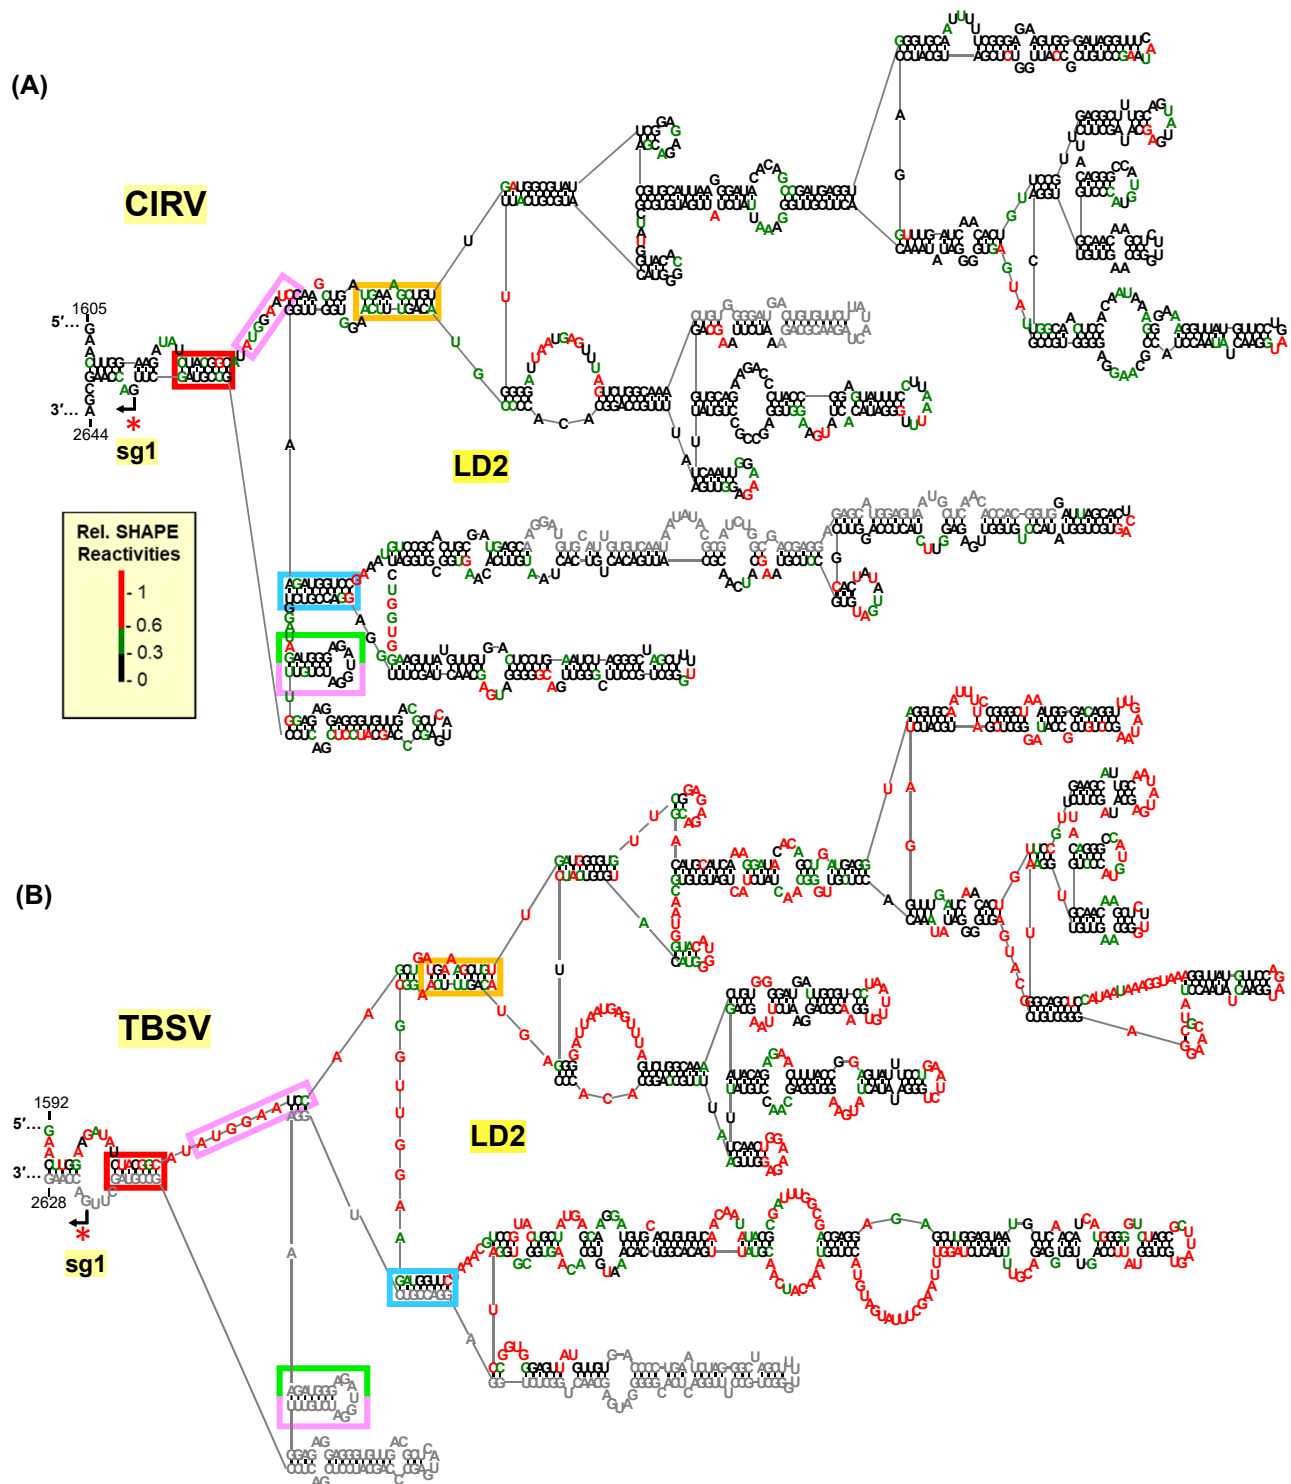

**Figure S2. RNA secondary structure of LD2 in the CIRV genome deduced through selective 2'-hydroxyl acylation analyzed by primer extension (SHAPE).** (A) SHAPE analysis was performed on the full-length CIRV RNA genome. The averages of normalized SHAPE reactivities from two independent SHAPE experiments were used as folding constraints in *RNAstructure* (slope value = 1.8 kcal/mol and intercept value = -0.6 kcal/mol) to deduce an RNA secondary structure for LD2. Nucleotides coloured in red were highly reactive, in green were moderately reactive, and in black were weakly reactive or unreactive. Nucleotides in grey correspond to regions for which no SHAPE data was obtained. (B) For comparison, SHAPE-guided secondary structure of LD2 in TBSV (adapted from 48). Key corresponding structural features are colour-coded (see text for details).

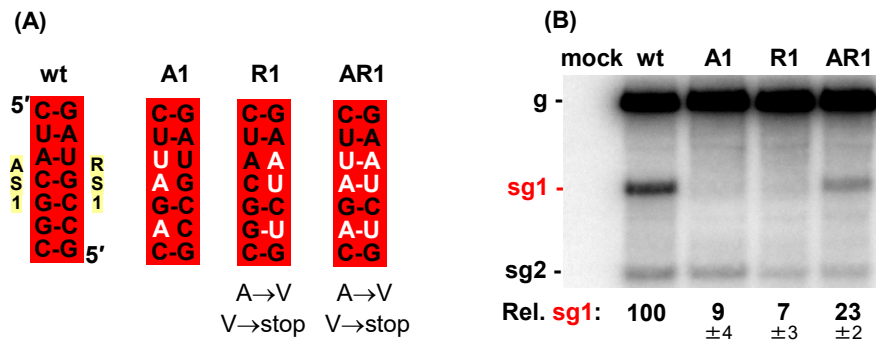

**Figure S3. The AS1/RS1 LDRI regulates sg mRNA1 transcription in CIRV. (A)** Compensatory mutations introduced in AS1 and RS1 in CIRV are shown in white. Amino acid changes in p95 are indicated under the mutant sequences. **(B)** Northern blot analysis of plus-strand CIRV RNAs extracted from protoplasts transfected with wt and mutant CIRV genomic RNAs shown in panel (A). Identities of the tested genomes are indicated above the blot, and positions of CIRV genome (g) and subgenomic mRNAs (sg1 and sg2) are shown on the left. Average plus-strand sg mRNA1 accumulation levels relative to that of the wt are provided below the blot with standard errors obtained from three independent experiments.

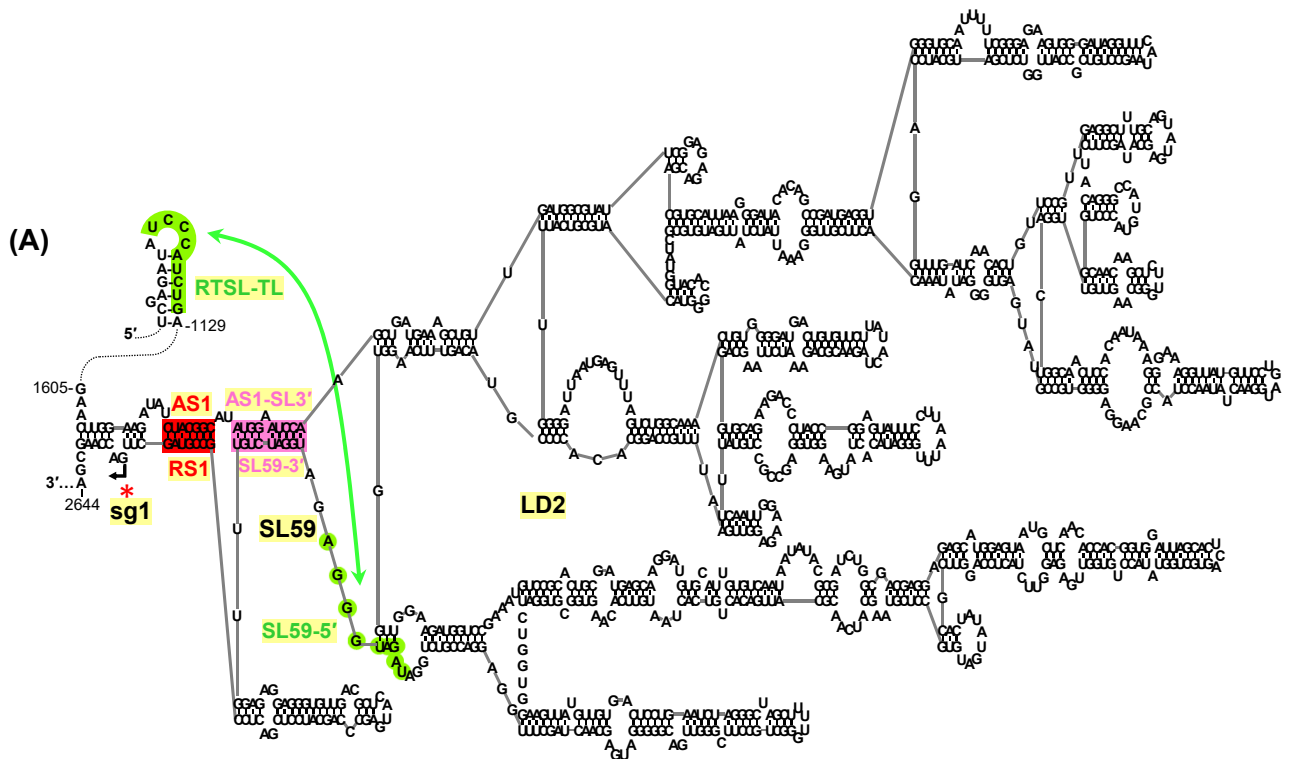

(B)

|             | AS1                       | RS1                       | AS1-SL3'                     | SL59-3'                      | RTSL-TL                      | SL59-5'                      |
|-------------|---------------------------|---------------------------|------------------------------|------------------------------|------------------------------|------------------------------|
| <b>CIRV</b> | 5'... <b>UAAGGG</b> ...3' | 5'... <b>GOOJAG</b> ...3' | 5'... <b>AUGGAUCCA</b> ...3' | 5'... <b>UGGAUCUGU</b> ...3' | 5'... <b>UOCCAUUUG</b> ...3' | 5'... <b>UAGAUGGGA</b> ...3' |
| LNV         | ... <b>UGGGGG</b> ...     | ... <b>GOOJAG</b> ...     | ... <b>AUGGAUCCA</b> ...     | ... <b>UGGAUCU</b> U...      | ... <b>UOCCAUUUG</b> ...     | ... <b>UAGAUGGGA</b> ...     |
| PLV         | ... <b>UGGGGG</b> ...     | ... <b>GOOJAG</b> ...     | ... <b>AUGGAUCCA</b> ...     | ... <b>UGGAUCU</b> U...      | ... <b>UOCCAUUUG</b> ...     | ... <b>UAGAUGGGA</b> ...     |
| TBSV-Ch     | ... <b>UAAGGG</b> ...     | ... <b>GOOJAG</b> ...     | ... <b>AUGGAUCCA</b> ...     | ... <b>UGGAUCUGU</b> ...     | ... <b>UOCCAUUUG</b> ...     | ... <b>AAGAUGGGA</b> ...     |
| TBSV-P      | ... <b>UAAGGG</b> ...     | ... <b>GOOJAG</b> ...     | ... <b>AUGGAUCCA</b> ...     | ... <b>UGGAUCU</b> U...      | ... <b>UOCCAUUUG</b> ...     | ... <b>GAGAUGGGA</b> ...     |
| AMCV        | ... <b>UAAGGG</b> ...     | ... <b>GOOJAG</b> ...     | ... <b>AUGGAUCCA</b> ...     | ... <b>UGGAU</b> UGU...      | ... <b>UOCCAUUUG</b> ...     | ... <b>UAGAUGGGA</b> ...     |
| TBSV-Nf     | ... <b>UAAGGG</b> ...     | ... <b>GOOJAG</b> ...     | ... <b>AUGGAUCCA</b> ...     | ... <b>UGGAU</b> U U...      | ... <b>UOCCAUUUG</b> ...     | ... <b>UAGAUGGGA</b> ...     |
| TBSV-St     | ... <b>UGGGGG</b> ...     | ... <b>GOOJAG</b> ...     | ... <b>AUGGAUCCA</b> ...     | ... <b>UGGAUCU</b> U...      | ... <b>UOCCAUUUG</b> ...     | ... <b>UAGAUGGGA</b> ...     |
| GALV        | ... <b>UGGGGG</b> ...     | ... <b>GOOJAG</b> ...     | ... <b>AUGGAUCCA</b> ...     | ... <b>UGGAUCUGU</b> ...     | ... <b>UOCCAUUUG</b> ...     | ... <b>UAGUGGGA</b> ...      |
| PNSV        | ... <b>UAAGGG</b> ...     | ... <b>GOOJAG</b> ...     | ... <b>AUGGAUCCA</b> ...     | ... <b>UGGAUCU</b> U...      | ... <b>UOCCAUUUG</b> ...     | ... <b>CAGAUGGGA</b> ...     |
| CuNV        | ... <b>UGGGGG</b> ...     | ... <b>GOOJAG</b> ...     | ... <b>AUGGAUCCA</b> ...     | ... <b>UGGAUCUUU</b> ...     | ... <b>UOCCAUUUG</b> ...     | ... <b>CAGAUGGGA</b> ...     |
| CymRV       | ... <b>UAAGGG</b> ...     | ... <b>GOOJAG</b> ...     | ... <b>AUGGAUCCA</b> ...     | ... <b>UGGAUCU</b> U...      | ... <b>UOCCAUUUG</b> ...     | ... <b>UAGAUGGGA</b> ...     |
| CBLV        | ... <b>UGGGGG</b> ...     | ... <b>GOOCCAG</b> ...    | ... <b>UUGGAAGUA</b> ...     | ... <b>UGGAUCUCU</b> ...     | ... <b>UOCCAUUUG</b> ...     | ... <b>CCGAUGGGA</b> ...     |
| LNSV-L2     | ... <b>UAAGGG</b> ...     | ... <b>GOOJAG</b> ...     | ... <b>AUGGAUCCA</b> ...     | ... <b>UGGAUCU</b> U...      | ... <b>UOCCAUUUG</b> ...     | ... <b>CAGAUGGGA</b> ...     |
| MPV-PM75    | ... <b>UAAGGG</b> ...     | ... <b>GOOJAG</b> ...     | ... <b>AUGGAUCCA</b> ...     | ... <b>UGGAUCU</b> U...      | ... <b>UOCCAUUUG</b> ...     | ... <b>CAGAUGGGA</b> ...     |
| EMCV        | ... <b>UGGGGG</b> ...     | ... <b>GOOJAG</b> ...     | ... <b>AUGGAUCCA</b> ...     | ... <b>UGGAUCU</b> U...      | ... <b>UOCCAUUUG</b> ...     | ... <b>UAGAUGGGA</b> ...     |
| CIRV-CZ     | ... <b>UGGGGG</b> ...     | ... <b>GOOJAG</b> ...     | ... <b>AUGGAUCCA</b> ...     | ... <b>UGGAUCU</b> U...      | ... <b>UOCCAUUUG</b> ...     | ... <b>CAGUGGGA</b> ...      |
| PLCV-T46    | ... <b>UAAGGG</b> ...     | ... <b>GOOJAG</b> ...     | ... <b>AUGGAUCCA</b> ...     | ... <b>UGGAUCU</b> U...      | ... <b>UOCCAUUUG</b> ...     | ... <b>AAGAUGGGA</b> ...     |
| MNeSV       | ... <b>UGGGGG</b> ...     | ... <b>GOOCCAG</b> ...    | ... <b>UUGGAUCCA</b> ...     | ... <b>UGGAUCUUU</b> ...     | ... <b>UOCCAUUUG</b> ...     | ... <b>GAGAUGGGA</b> ...     |
|             | ** ****                   | **** *                    | * ** *                       | **** * *                     | *****                        | * *****                      |

CBLV – alternative interaction:

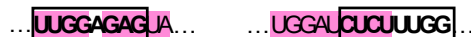

Figure S4

**Figure S4. Structural depiction and comparative sequence analysis of the AS1/RS1, AS1-SL3'/SL59-3', and RTSL-TL/SL59-5' interactions. (A)** CIRV secondary structure showing formation of the intra-LD2 AS1-SL3'/SL59-3' (pink) interaction. **(B)** Comparative sequence analysis of AS1/RS1 (red), AS1-SL3'/SL59-3' (pink) and RTSL-TL/SL59-5' (green) interactions between the members of the Tombusvirus genus, and Zeavirus genus (*i.e.* MNeSV, the most closely related genus to tombusviruses). Nucleotide substitutions that maintain base pairing are in white, while those that do not preserve pairing are in red. The asterisks below correspond to the nucleotides that are 100% conserved. The AS1-SL3'/SL59-3' (pink) interaction for CBLV does not conform to the pairing scheme observed in the other viruses, and when the CBLV genome was analyzed by *mFold* an alternative base pairing scheme was predicted (boxed sequences at bottom of table). Tombusviruses: Carnation Italian ringspot virus (CIRV, NC\_003500.3), Lisianthus necrosis virus (LNV, DQ011234.1), Pear latent virus (PLV, AY100482.1), Tomato bushy stunt virus cherry isolate (TBSV-Ch, M21958.1), TBSV pepper isolate (TBSV-P, U80935.1), Artichoke mottled crinkle virus (AMCV, NC\_001339.1), TBSV nipplefruit isolate (TBSV-Nf, AY579432), TBSV statice isolate (TBSV-St, AJ249740.1), Grapevine Algerian latent virus (GALV, NC\_011535.1), Pelargonium necrotic spot virus (PNSV, NC\_005285.1), Cucumber necrosis virus (CuNV, NC\_001469.1), Cymbidium ringspot virus (CymRSV, NC\_003532.1), Cucumber Bulgarian latent virus (CBLV, NC\_004725.1), Lettuce necrotic stunt virus isolate L2 (LNCV-L2, JN700748.1), Moroccan pepper virus isolate PM75 (MPV-PM75, NC\_020073.2), Eggplant mottled crinkle virus (EMCV, NC\_023339.1), CIRV isolate CZ (KP888563.1), Pelargonium leaf curl virus isolate T46 (PLCV-T46, NC\_030452.1). Zeavirus: Maize necrotic streak virus (MNeSV, NC\_007729.1).

|             | S38                  |                     | S56                 |                     |
|-------------|----------------------|---------------------|---------------------|---------------------|
| <b>CIRV</b> | 5'...UGAAAGCUGU...3' | 5'...ACAGUUUCA...3' | 5'...AGAUGGUCC...3' | 5'...GGACCGUCU...3' |
| LNV         | ...UGAAAGCUGU...     | ...ACAGUUUGA...     | ...AGAUGGUUC...     | ...GGACCGUCU...     |
| PLV         | ...UGAAAGCUGU...     | ...ACAGUUUGA...     | ...AGAUGGUUC...     | ...GGACCGUCU...     |
| TBSV-Ch     | ...UGAAAGCUGU...     | ...ACAGUUUCA...     | ...AGAUGGUUC...     | ...GGACCGUCU...     |
| TBSV-P      | ...UGAAAGCUGU...     | ...ACAGUUUCA...     | ...AGAUGGUCC...     | ...GGA CGUCU...     |
| AMCV        | ...UGAAAGCUGU...     | ...ACAGUUUCA...     | ...AGAUGGUUC...     | ...GGA CGUCU...     |
| TBSV-Nf     | ...UGAAAGCUGU...     | ...ACAGUUUCA...     | ...AGAUGGUCC...     | ...GGA CGUCU...     |
| TBSV-St     | ...UGAAAGCUGU...     | ...ACAGUUUCA...     | ...AGAUGGUCC...     | ...GGA CGUCU...     |
| GALV        | ...UGAAAGCUGU...     | ...ACAGUUUCA...     | ...AGAUGGUCC...     | ...GGACCGUCU...     |
| PNSV        | ...UGAAAGCUGU...     | ...ACAGUUUCA...     | ...AGAUGGUCC...     | ...GGACCGUCU...     |
| CuNV        | ...UGAAAGCUGU...     | ...GCAGUUUCA...     | ...AGAUGGUCC...     | ...GGACCGAU...      |
| CymRV       | ...UGAAAGCUGU...     | ...ACAGUUUCA...     | ...AGAUGGUCA...     | ...GGA CGUCU...     |
| CBLV        | ...UGAAAGCGGU...     | ...CAAGUUUCA...     | ...AGAUGGUCC...     | ...GGACAGAU...      |
| LNSV-L2     | ...UGAAAGCUGU...     | ...CCAGUUUCA...     | ...AGAUGGUCA...     | ...GGACCGU U...     |
| MPV-PM75    | ...UGAAAGCUGU...     | ...CCAGUUUCA...     | ...AGAUGGUCA...     | ...GGACCGU U...     |
| EMCV        | ...UGAAAGCUGU...     | ...ACAGUUUCA...     | ...AGAUGGUCC...     | ...GGACCGUCU...     |
| CIRV-CZ     | ...UGAAAGCUGU...     | ...ACAGUUUCA...     | ...AGAUGGUCA...     | ...GGACCGUCU...     |
| PLCV-T46    | ...UGAAAGCUGU...     | ...ACAGUUUCA...     | ...A AUGGUCC...     | ...GGACCGU U...     |
| MNeSV       | ...UGAAAGCGGU...     | ...ACAGUUUCA...     | ...AGAUGGUUC...     | ...GGACCGUCU...     |
|             | ***** **             | * *** *             | * *****             | *** * *             |

**Figure S5. Comparative sequence analysis of S38 and S56 in the Tombusvirus and Zeavirus genera.** Nucleotide substitutions that maintain base pairing are depicted in white, while those that do not preserve pairing are in red. The asterisks below correspond to the nucleotides that are 100% conserved among the analysed viral sequences. Tombusviruses: Carnation Italian ringspot virus (CIRV, NC\_003500.3), Lisianthus necrosis virus (LNV, DQ011234.1), Pear latent virus (PLV, AY100482.1), Tomato bushy stunt virus cherry isolate (TBSV-Ch, M21958.1), TBSV pepper isolate (TBSV-P, U80935.1), Artichoke mottled crinkle virus (AMCV, NC\_001339.1), TBSV nipplefruit isolate (TBSV-Nf, AY579432), TBSV statica isolate (TBSV-St, AJ249740.1), Grapevine Algerian latent virus (GALV, NC\_011535.1), Pelargonium necrotic spot virus (PNSV, NC\_005285.1), Cucumber necrosis virus (CuNV, NC\_001469.1), Cymbidium ringspot virus (CymRSV, NC\_003532.1), Cucumber Bulgarian latent virus (CBLV, NC\_004725.1), Lettuce necrotic stunt virus isolate L2 (LNCV-L2, JN700748.1), Moroccan pepper virus isolate PM75 (MPV-PM75, NC\_020073.2), Eggplant mottled crinkle virus (EMCV, NC\_023339.1), CIRV isolate CZ (KP888563.1), Pelargonium leaf curl virus isolate T46 (PLCV-T46, NC\_030452.1). Zeavirus: Maize necrotic streak virus (MNeSV, NC\_007729.1).

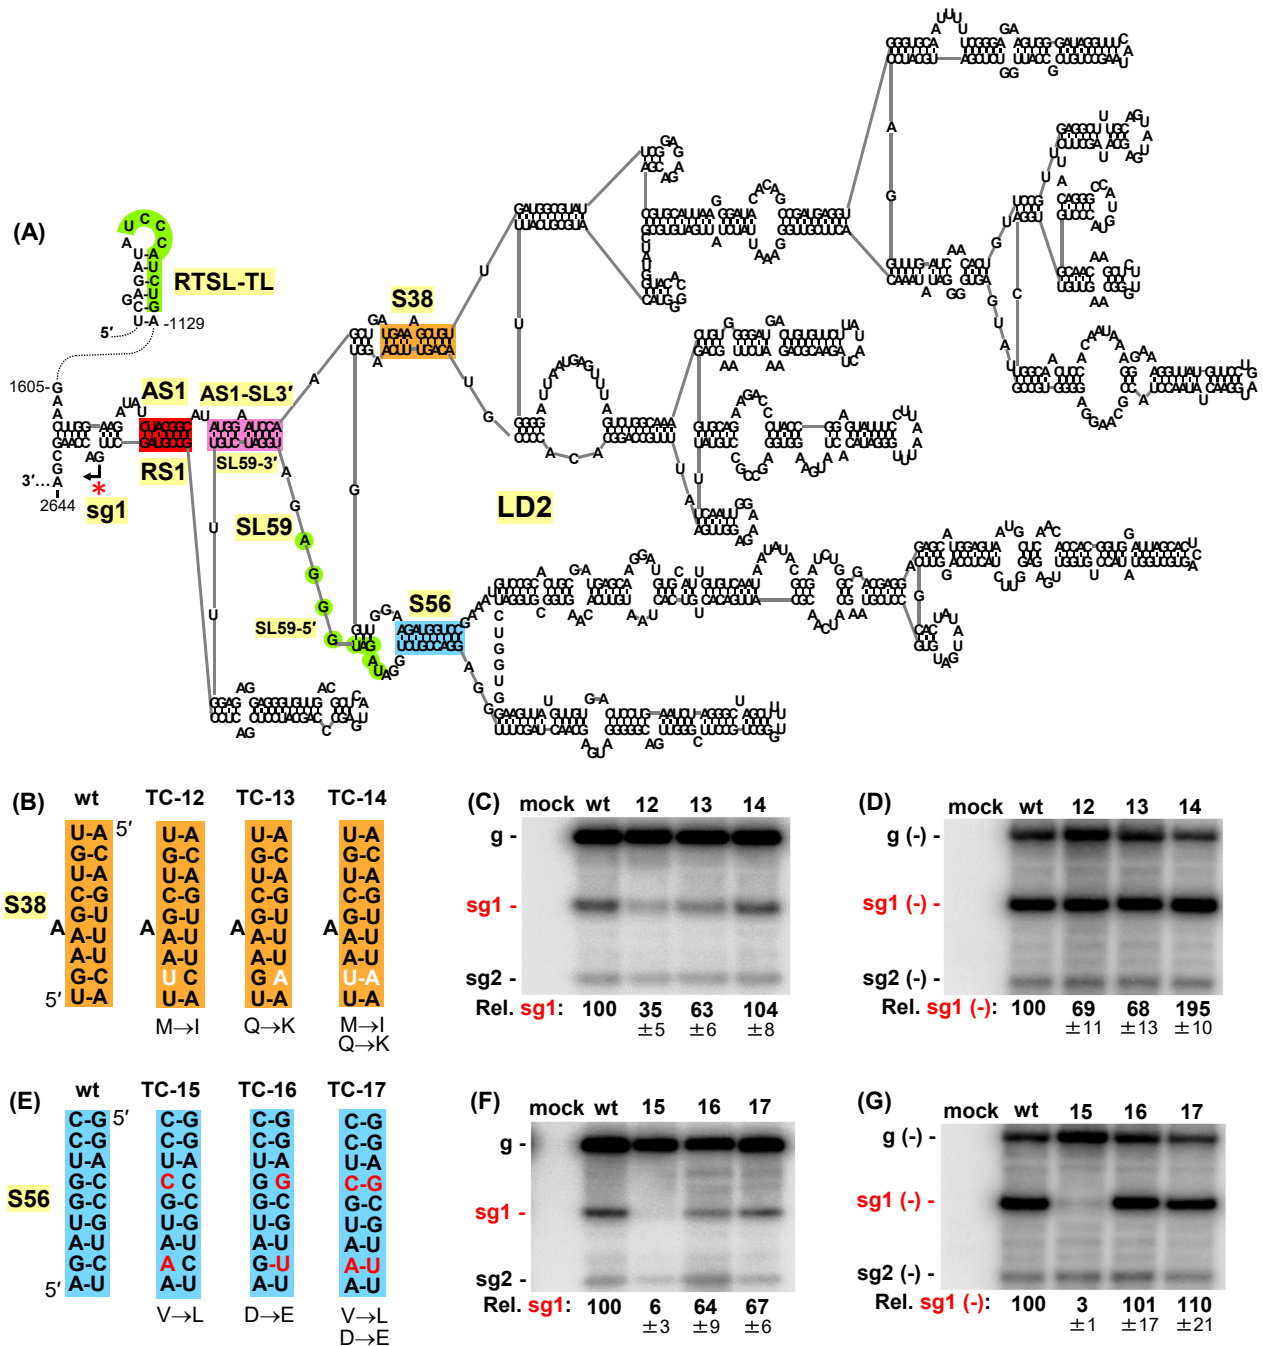

**Figure S6. Functional analysis of S38 and S56.** (A) Secondary structure of RTSL-TL and LD2 regions in the CIRV genome. Key structures are colour-coded. (B), (E) Compensatory substitutions that were introduced in the full-length CIRV genome to functionally assess S38 (orange) and S56 (blue), respectively. Amino acid changes in the p95 ORF are indicated under each mutant. (C), (F) Northern blot analysis of plus-strand RNAs isolated from protoplasts transfected with CIRV wt and mutant genomic RNAs shown in (B) and (E), respectively. Identities of the tested samples are indicated above the blots and positions of positive-sense genome and sg mRNAs are shown on the left. Average sg mRNA1 accumulation levels relative to that of the wt are provided below the blots with standard errors obtained from three independent experiments. (D), (G) Northern blot analysis of minus-strand CIRV RNAs isolated from protoplast infections. Average minus-strand sg mRNA1 accumulation levels relative to that of the wt are provided below the blots with standard errors obtained from three independent experiments. For mutant 12 in panel D and mutant 16 in panel G, relative sg RNA minus-strand levels were higher than their plus-strand counterparts. This is likely due to inaccurate RdRp termination (caused by a mutated attenuation structure) during (-)sgRNA synthesis, which results in a promoter (Pr, see supplemental Fig. S1) with either missing or added 3'-terminal nucleotides that inhibits its use as transcriptional promoter.



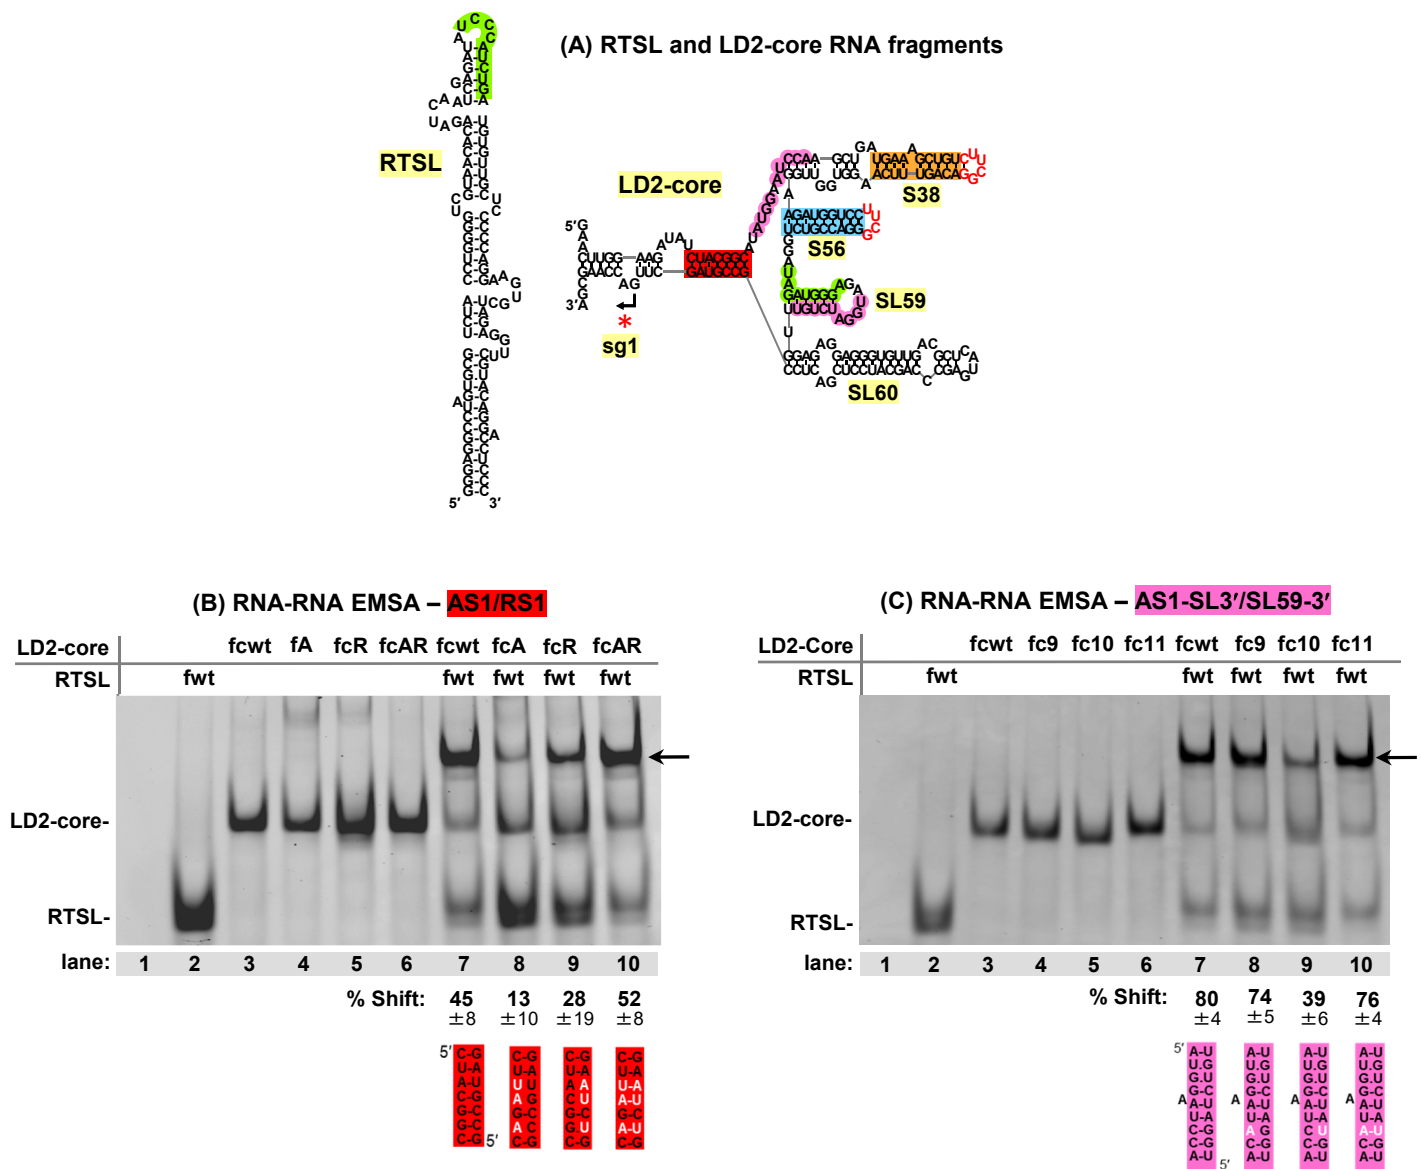

**Figure S7. RTSL/LD2-core complex formation relies on both the AS1/RS1 and AS1-SL3'/SL59-3' interactions.** (A) Secondary structures of RTSL (106 nt) and LD2-core (188 nt) RNA fragments tested in RNA-RNA EMSAs. RTSL-TL (green), AS1/RS1 (red), AS1-SL3' (pink), S38 (orange), S56 (blue), SL59 (green and pink), and LS60 are indicated. Sg mRNA1 initiation site is depicted with a small black arrow and a red asterisk. (B), (C) RNA-RNA EMSA results for RTSL and LD2-core RNA fragments shown in panel (A) with the modifications indicated below the gels. RNAs were separated in native 8% polyacrylamide gels, which were stained with ethidium bromide. The contents of each lane are indicated above the gels with the fragment type shown to the far left. Lane 1 contains only RNA binding buffer and glycerol. The black arrows on the right side of the images point to where the RTSL/LD2-core complexes migrate. The percentages and standard errors of shifted LD2-core RNAs compared to the corresponding non-shifted LD2-core RNAs are displayed below the gels and were obtained from three independent EMSA experiments.

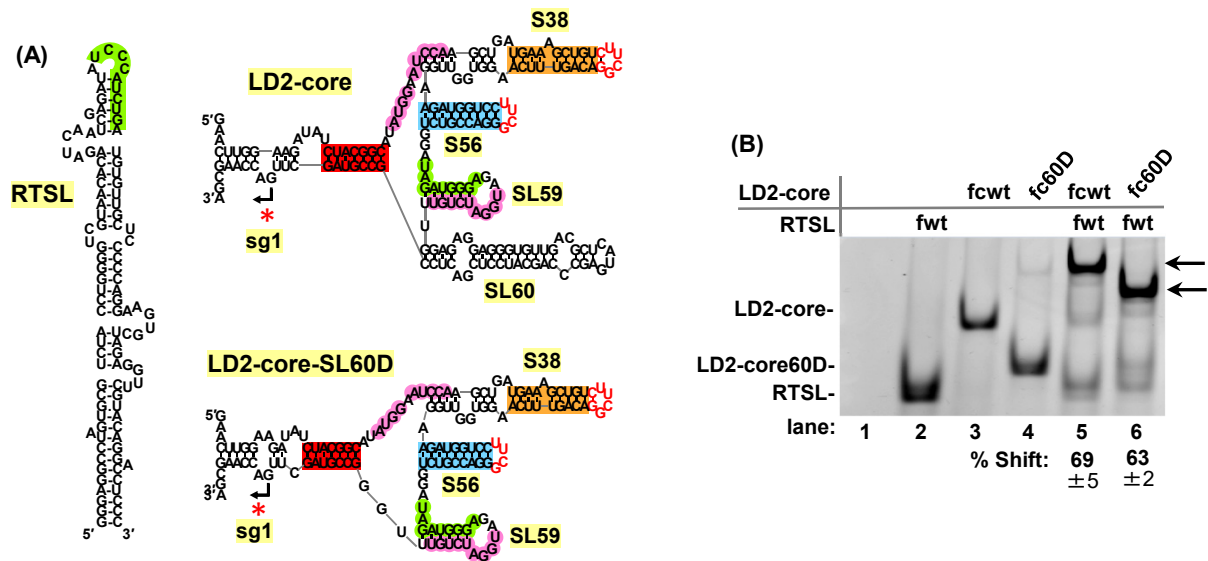

**Figure S8. SL60 is not required for RTSL/LD2-core complex formation.** **(A)** RNA secondary structures of RTSL (106 nt), LD2-core (188 nt), and LD2-core-SL60D (145 nt, with SL60 deleted) fragments tested by RNA-RNA EMSA. **(B)** RNA-RNA EMSA results for the RNA fragments shown in (A). The contents of each lane are indicated above the native 8% polyacrylamide gel stained with ethidium bromide, with the fragment type shown on the far left. Lane 1 represents a mock lane containing only RNA binding buffer and glycerol. The black arrows on the right side of the image point to where the RTSL/LD2-core and RTSL/LD2-core-SL60D complexes migrate. The percentages and standard errors of shifted LD2-core RNAs compared to the corresponding non-shifted LD2-core RNAs are displayed below the gels and were obtained from three independent EMSA experiments.

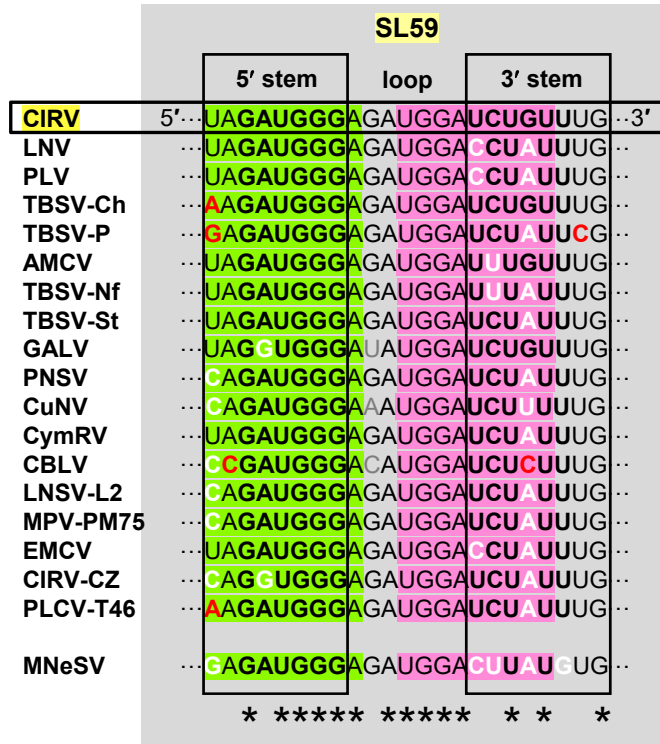

**Figure S9. Comparative sequence analysis of SL59 in the Tombusvirus and Zeavirus genera.** Boxed nucleotides represent complementary sequences that form the stem of SL59. The green and pink nucleotides depict SL59-5' and AS1-SL3' sequences that are complementary to RTSL-TL and AS1-SL3' sequences, respectively. Nucleotide substitutions that maintain base pairing are in white, while those that do not preserve pairing are in red. The asterisks below correspond to the nucleotides that are 100% conserved. Tombusviruses: Carnation Italian ringspot virus (CIRV, NC\_003500.3), Lisianthus necrosis virus (LNV, DQ011234.1), Pear latent virus (PLV, AY100482.1), Tomato bushy stunt virus cherry isolate (TBSV-Ch, M21958.1), TBSV pepper isolate (TBSV-P, U80935.1), Artichoke mottled crinkle virus (AMCV, NC\_001339.1), TBSV nipplefruit isolate (TBSV-Nf, AY579432), TBSV statice isolate (TBSV-St, AJ249740.1), Grapevine Algerian latent virus (GALV, NC\_011535.1), Pelargonium necrotic spot virus (PNSV, NC\_005285.1), Cucumber necrosis virus (CuNV, NC\_001469.1), Cymbidium ringspot virus (CymRSV, NC\_003532.1), Cucumber Bulgarian latent virus (CBLV, NC\_004725.1), Lettuce necrotic stunt virus isolate L2 (LNCV-L2, JN700748.1), Moroccan pepper virus isolate PM75 (MPV-PM75, NC\_020073.2), Eggplant mottled crinkle virus (EMCV, NC\_023339.1), CIRV isolate CZ (KP888563.1), Pelargonium leaf curl virus isolate T46 (PLCV-T46, NC\_030452.1). Zeavirus: Maize necrotic streak virus (MNeSV, NC\_007729.1).

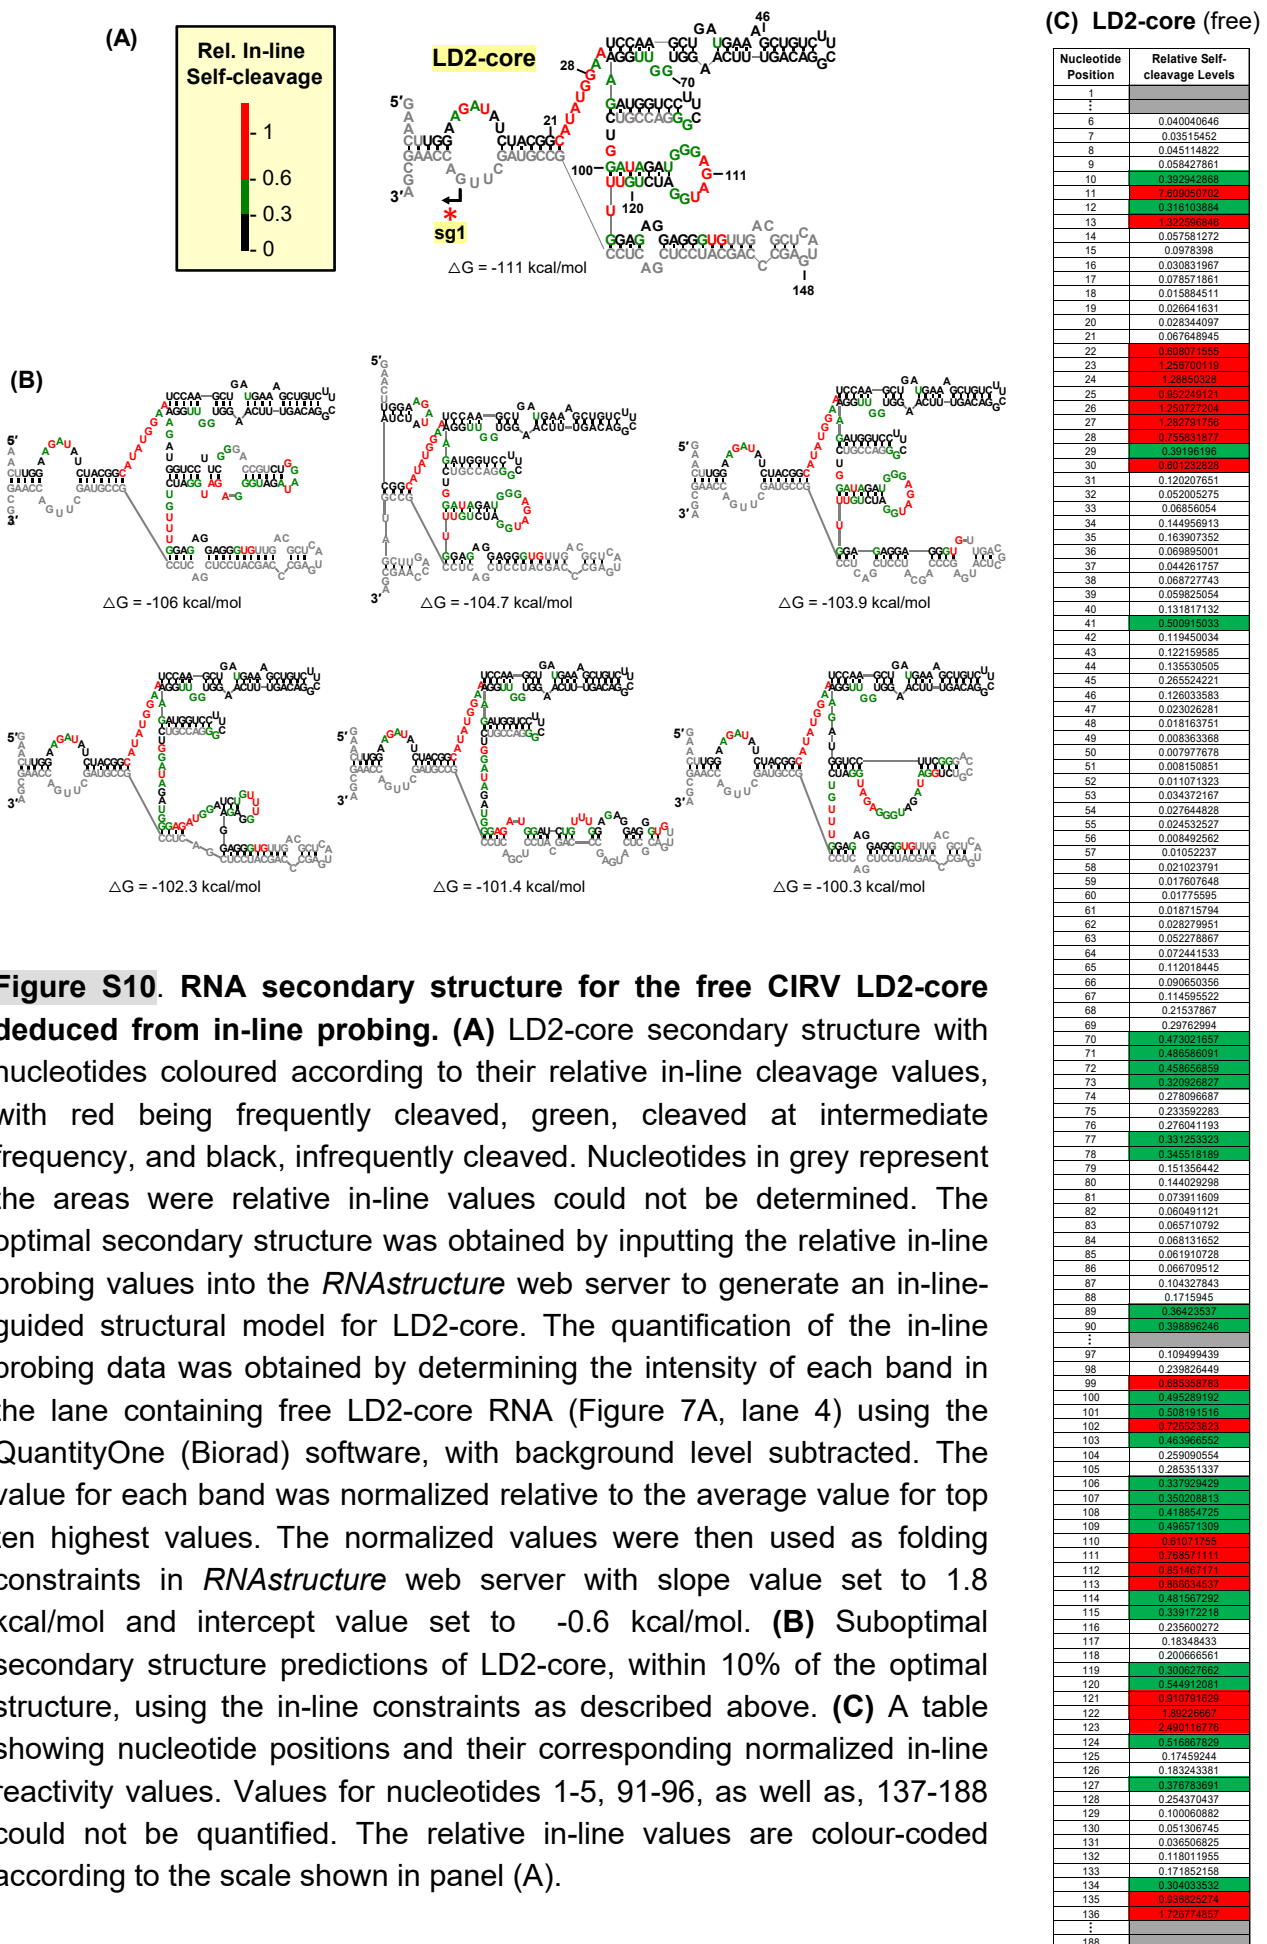

**Figure S10. RNA secondary structure for the free CIRV LD2-core deduced from in-line probing.** (A) LD2-core secondary structure with nucleotides coloured according to their relative in-line cleavage values, with red being frequently cleaved, green, cleaved at intermediate frequency, and black, infrequently cleaved. Nucleotides in grey represent the areas where relative in-line values could not be determined. The optimal secondary structure was obtained by inputting the relative in-line probing values into the *RNAstructure* web server to generate an in-line-guided structural model for LD2-core. The quantification of the in-line probing data was obtained by determining the intensity of each band in the lane containing free LD2-core RNA (Figure 7A, lane 4) using the QuantityOne (Biorad) software, with background level subtracted. The value for each band was normalized relative to the average value for top ten highest values. The normalized values were then used as folding constraints in *RNAstructure* web server with slope value set to 1.8 kcal/mol and intercept value set to -0.6 kcal/mol. (B) Suboptimal secondary structure predictions of LD2-core, within 10% of the optimal structure, using the in-line constraints as described above. (C) A table showing nucleotide positions and their corresponding normalized in-line reactivity values. Values for nucleotides 1-5, 91-96, as well as, 137-188 could not be quantified. The relative in-line values are colour-coded according to the scale shown in panel (A).

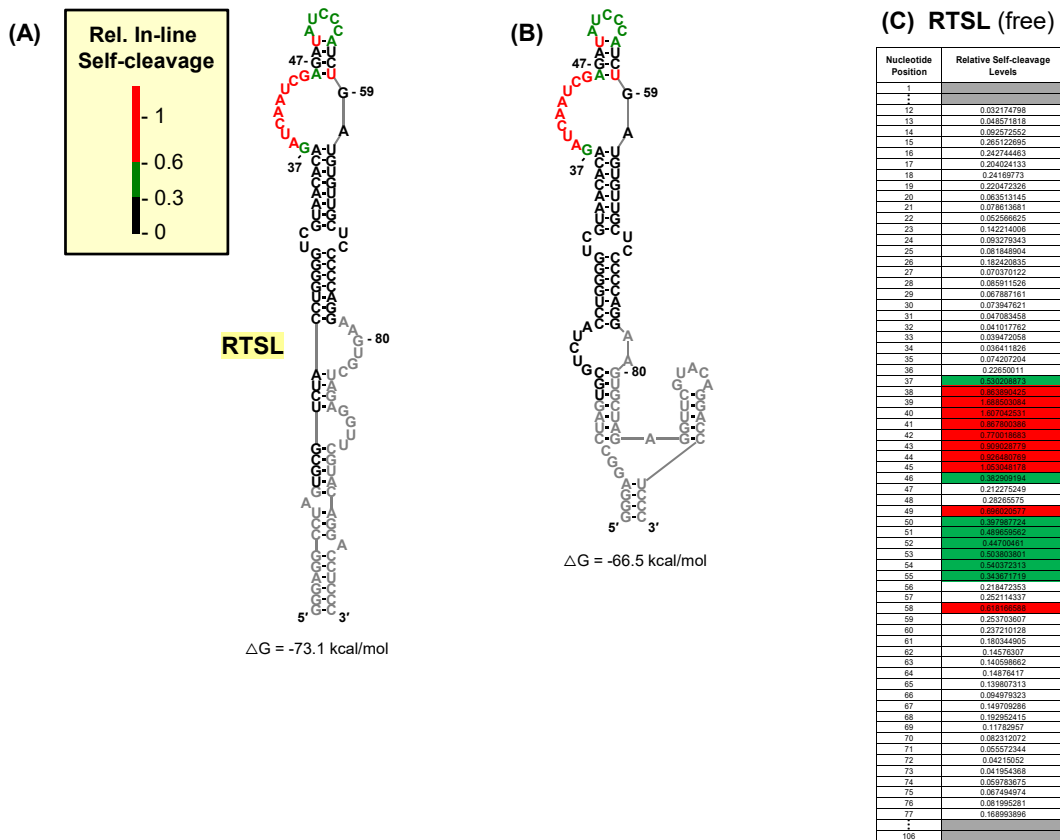

**Figure S11. RNA secondary structure for the free CIRV RTSL determined from in-line probing analysis. (A)** RTSL secondary structure with nucleotides coloured according to their relative in-line cleavage values, with red being frequently cleaved, green, cleaved at intermediate frequency, and black, infrequently cleaved. Nucleotides in grey represent the areas where relative in-line values could not be determined. The secondary structure was determined by inputting the relative in-line probing values into the *RNAstructure* web server to generate an in-line-guided structural model for RTSL. To obtain the relative in-line probing data the intensity of each band in the lane containing free RTSL RNA (Figure 7C, lane 4) was quantified using the QuantityOne (Biorad) software, with background level subtracted. The value for each band was normalized relative to the average value for top ten highest values. The normalized values were then used as folding constraints in *RNAstructure* web server with slope value set to 1.8 kcal/mol and intercept value set to -0.6 kcal/mol. **(B)** A suboptimal secondary structure of RTSL, within 10% of the optimal structure, predicted through using in-line constraints as described above. **(C)** A table showing nucleotide positions and their corresponding normalized in-line reactivity values. Values for nucleotides 1-11 and 78-106 could not be quantified. The relative in-line values are colour-coded according to the scale shown in panel (A).

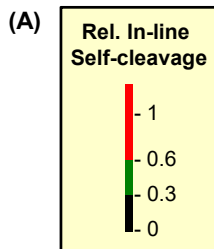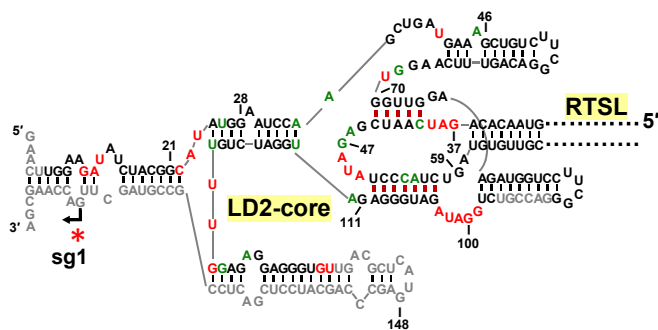

(B) RTSL  
(complexed)

| Nucleotide Position | Relative Self-cleavage Levels |
|---------------------|-------------------------------|
| 1                   |                               |
| 2                   |                               |
| 3                   |                               |
| 4                   | 0.023553                      |
| 5                   | 0.092097                      |
| 6                   | 0.035427                      |
| 7                   | 0.242127                      |
| 8                   | 0.216190                      |
| 9                   | 0.232924                      |
| 10                  | 0.198855                      |
| 11                  | 0.043011                      |
| 12                  | 0.061892                      |
| 13                  | 0.091894                      |
| 14                  | 0.156932                      |
| 15                  | 0.089903                      |
| 16                  | 0.028213                      |
| 17                  | 0.198508                      |
| 18                  | 0.058891                      |
| 19                  | 0.100066                      |
| 20                  | 0.066709                      |
| 21                  | 0.073593                      |
| 22                  | 0.061110                      |
| 23                  | 0.027659                      |
| 24                  | 0.017375                      |
| 25                  | 0.018316                      |
| 26                  | 0.0254870                     |
| 27                  | 0.147941                      |
| 28                  | 0.893935                      |
| 29                  | 0.618648                      |
| 30                  | 0.329844                      |
| 31                  | 0.202065                      |
| 32                  | 0.196099                      |
| 33                  | 0.165729                      |
| 34                  | 0.241558                      |
| 35                  | 0.252292                      |
| 36                  | 0.204472                      |
| 37                  | 0.364220                      |
| 38                  | 0.360376                      |
| 39                  | 0.178039                      |
| 40                  | 0.177791                      |
| 41                  | 0.252911                      |
| 42                  | 0.232509                      |
| 43                  | 0.145921                      |
| 44                  | 0.126760                      |
| 45                  | 0.128664                      |
| 46                  | 0.141068                      |
| 47                  | 0.153013                      |
| 48                  | 0.144609                      |
| 49                  | 0.107221                      |
| 50                  | 0.170729                      |
| 51                  | 0.167898                      |
| 52                  | 0.098529                      |
| 53                  | 0.050942                      |
| 54                  | 0.024704                      |
| 55                  | 0.014345                      |
| 56                  | 0.015775                      |
| 57                  | 0.033291                      |
| 58                  | 0.045561                      |
| 59                  | 0.072410                      |
| 60                  | 0.195089                      |
| 61                  |                               |
| 62                  |                               |
| 63                  |                               |
| 64                  |                               |
| 65                  |                               |
| 66                  |                               |
| 67                  |                               |
| 68                  |                               |
| 69                  |                               |
| 70                  |                               |
| 71                  |                               |
| 72                  |                               |
| 73                  |                               |
| 74                  |                               |
| 75                  |                               |
| 76                  |                               |
| 77                  |                               |
| 78                  |                               |
| 79                  |                               |
| 80                  |                               |
| 81                  |                               |
| 82                  |                               |
| 83                  |                               |
| 84                  |                               |
| 85                  |                               |
| 86                  |                               |
| 87                  |                               |
| 88                  |                               |
| 89                  |                               |
| 90                  |                               |
| 91                  |                               |
| 92                  |                               |
| 93                  |                               |
| 94                  |                               |
| 95                  |                               |
| 96                  |                               |
| 97                  |                               |
| 98                  |                               |
| 99                  |                               |
| 100                 |                               |

(C) LD2-core  
(complexed)

| Nucleotide Position | Relative Self-cleavage Levels |
|---------------------|-------------------------------|
| 1                   |                               |
| 2                   |                               |
| 3                   |                               |
| 4                   |                               |
| 5                   |                               |
| 6                   | 0.001473                      |
| 7                   | 0.00388                       |
| 8                   | 0.035427                      |
| 9                   | 0.072936                      |
| 10                  | 0.246933                      |
| 11                  | 0.656207                      |
| 12                  | 0.712107                      |
| 13                  | 0.741458                      |
| 14                  | 0.213634                      |
| 15                  | 0.138475                      |
| 16                  | 0.005693                      |
| 17                  | 0.054576                      |
| 18                  | 0.004939                      |
| 19                  | 0.009842                      |
| 20                  | 0.007937                      |
| 21                  | 0.03121                       |
| 22                  | 0.629676                      |
| 23                  | 1.890512                      |
| 24                  | 0.77078                       |
| 25                  | 0.291076                      |
| 26                  | 0.362488                      |
| 27                  | 0.132877                      |
| 28                  | 0.141725                      |
| 29                  | 0.183578                      |
| 30                  | 0.243749                      |
| 31                  | 0.058285                      |
| 32                  | 0.032703                      |
| 33                  | 0.120904                      |
| 34                  | 0.444934                      |
| 35                  | 0.366546                      |
| 36                  | 0.221611                      |
| 37                  | 0.463055                      |
| 38                  | 0.194632                      |
| 39                  | 0.108563                      |
| 40                  | 0.221134                      |
| 41                  | 0.893935                      |
| 42                  | 0.179884                      |
| 43                  | 0.189504                      |
| 44                  | 0.16693                       |
| 45                  | 0.305328                      |
| 46                  | 0.126038                      |
| 47                  | 0.00978                       |
| 48                  | 0.004443                      |
| 49                  | 0.002372                      |
| 50                  | 0.001134                      |
| 51                  | 2.79E-06                      |
| 52                  | 0.002467                      |
| 53                  | 0.017115                      |
| 54                  | 0.001367                      |
| 55                  | 0.008754                      |
| 56                  | 0.000249                      |
| 57                  | 0.000159                      |
| 58                  | 0.005881                      |
| 59                  | 0.002068                      |
| 60                  | 0.00952                       |
| 61                  | 0.004509                      |
| 62                  | 0.022678                      |
| 63                  | 0.06389                       |
| 64                  | 0.126041                      |
| 65                  | 0.205804                      |
| 66                  | 0.412211                      |
| 67                  | 0.170532                      |
| 68                  | 0.308491                      |
| 69                  | 0.637474                      |
| 70                  | 0.123865                      |
| 71                  | 0.076743                      |
| 72                  | 0.063669                      |
| 73                  | 0.080093                      |
| 74                  | 0.08131                       |
| 75                  | 0.106665                      |
| 76                  | 0.103481                      |
| 77                  | 0.091952                      |
| 78                  | 0.076316                      |
| 79                  | 0.052306                      |
| 80                  | 0.057136                      |
| 81                  | 0.043743                      |
| 82                  | 0.038206                      |
| 83                  | 0.040138                      |
| 84                  | 0.044485                      |
| 85                  | 0.042235                      |
| 86                  | 0.042943                      |
| 87                  | 0.072407                      |
| 88                  | 0.125225                      |
| 89                  | 0.168186                      |
| 90                  | 0.128331                      |
| 91                  |                               |
| 92                  |                               |
| 93                  | 0.058693                      |
| 94                  | 0.189289                      |
| 95                  | 0.860742                      |
| 96                  | 1.160101                      |
| 97                  | 1.062392                      |
| 98                  | 1.578603                      |
| 99                  | 0.613122                      |
| 100                 | 0.145481                      |
| 101                 |                               |
| 102                 |                               |
| 103                 |                               |
| 104                 |                               |
| 105                 | 0.087883                      |
| 106                 | 0.081532                      |
| 107                 | 0.082773                      |
| 108                 | 0.09309                       |
| 109                 | 0.116757                      |
| 110                 | 0.157805                      |
| 111                 | 0.224963                      |
| 112                 | 0.463995                      |
| 113                 | 0.493022                      |
| 114                 | 0.269072                      |
| 115                 | 0.178872                      |
| 116                 | 0.089739                      |
| 117                 | 0.083439                      |
| 118                 | 0.109507                      |
| 119                 | 0.170251                      |
| 120                 | 0.341581                      |
| 121                 | 0.773714                      |
| 122                 | 2.08539                       |
| 123                 | 4.769699                      |
| 124                 | 0.447419                      |
| 125                 | 0.128304                      |
| 126                 | 0.146346                      |
| 127                 | 0.393248                      |
| 128                 | 0.264826                      |
| 129                 | 0.087765                      |
| 130                 | 0.002121                      |
| 131                 | 0.009574                      |
| 132                 | 0.038115                      |
| 133                 | 0.098375                      |
| 134                 | 0.273933                      |
| 135                 | 0.460383                      |
| 136                 | 1.892186                      |
| 137                 |                               |
| 138                 |                               |
| 139                 |                               |
| 140                 |                               |
| 141                 |                               |
| 142                 |                               |
| 143                 |                               |
| 144                 |                               |
| 145                 |                               |
| 146                 |                               |
| 147                 |                               |
| 148                 |                               |

**Figure S12. Secondary structure analysis of the RTSL/LD2-core complex.** (A) Secondary structure of the RTSL/LD2-core complex with nucleotides coloured according to their relative in-line cleavage values, with red being frequently cleaved, green, cleaved at intermediate frequency, and black, infrequently cleaved. Nucleotides in grey represent the areas where relative in-line values could not be determined. The relative in-line probing data was obtained by quantifying the intensity of each band in the lane containing complexed RTSL and LD2-core RNAs (Figure 7C, lane 5; Figure 7A, lane 5) using the QuantityOne (Biorad) software, with background level subtracted. The values were normalized in the same manner as described in captions for Figure S9 and S10. The normalized self-cleavage values for RTSL and LD2-core were then mapped onto the RTSL/LD2-core complex, with the *trans*-interacting sequences in the RTSL/LD2-core complex deduced from the relative reactivities in the two RNAs. (B), (C) Tables showing nucleotide positions and their corresponding normalized in-line self-cleavage values of RTSL and LD2-core, respectively when complexed. Values for nucleotides 1-11 and 78-106 of RTSL and 1-5, 91-96, as well as, 137-188 of LD2-core could not be quantified. The relative in-line values are colour-coded according to the scale shown in panel (A).

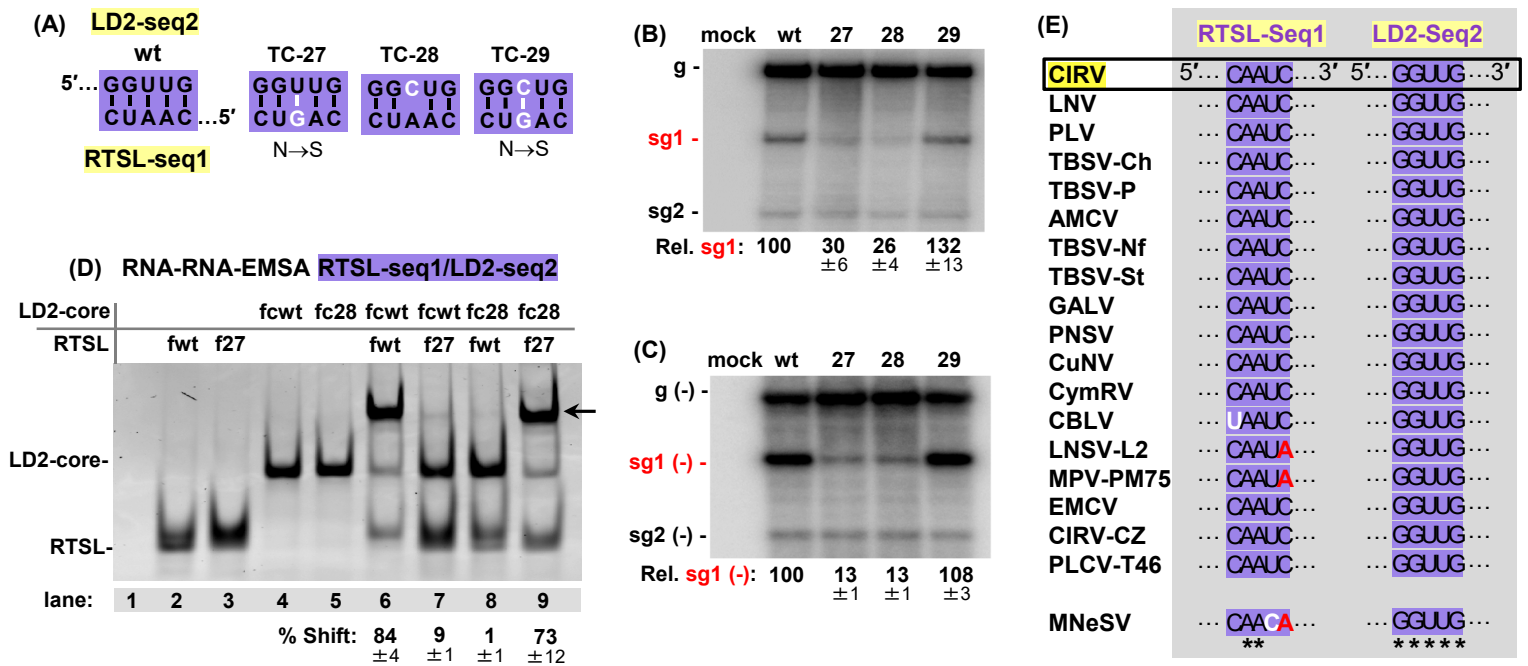

**Figure S13. Functional analysis of the proposed second RTSL/LD2 interaction involving RTSL-seq1 and LD2-seq2.** (A) Compensatory mutations introduced into the full-length CIRV genome in the proposed RTSL-seq1/LD2-seq2 LDRI (purple) are highlighted in white. Amino acid changes in the p95 ORF are indicated under each mutant. (B) Northern blot analysis of plus-strand RNAs isolated from protoplasts transfected with wt and mutant CIRV genomic RNAs shown in panel (A). Identities of the tested samples are indicated above the blot with the positions of positive-sense genome and sg mRNAs shown on the left. Average sg mRNA1 accumulation levels relative to that of the wt are provided below the blot with standard errors obtained from three independent experiments. (C) Northern blot analysis of minus-strand CIRV RNAs isolated from protoplasts transfected with wt and mutant CIRV genomic RNAs shown in (A). Identities of the tested samples are indicated above the blot and the positions of the minus-sense genome and sg mRNAs are shown on the left. Average minus-strand sg mRNA1 accumulation levels relative to that of the wt are provided below the blot with standard errors obtained from three independent experiments. (D) RNA-RNA EMSA results for the RTSL (106 nt) and LD2-core (188 nt) RNA fragments containing substitutions shown in (A). The contents of each lane are indicated above the native 8% polyacrylamide gel stained with ethidium bromide, with the fragment type shown on the far left. Lane 1 represents a mock lane containing only RNA binding buffer and glycerol. The black arrow on the right side of the image points to the position at which RTSL/LD2-core complex migrates. The percentages and standard errors of shifted LD2-core RNAs compared to the corresponding not-shifted LD2 RNAs are displayed below the gels obtained from three independent EMSA experiments. (E) Comparative sequence analysis of RTSL-seq1 and LD2-seq2 in the members of the Tombusvirus and Zeavirus genera. Red nucleotides represent substitutions that disrupt RTSL-seq1/LD2-seq2 interaction and the white nucleotide represents the substitution that maintains the interaction. Asterisks depict nucleotides that are 100% conserved among the compared viral sequences. See legend for Figure S4 for full names and accession numbers of the viral species.
